# Supplementary material for: The use of the Multidimensional Condom Attitude Scale in Chinese young adults
Source: PubMed Central journal article supplement (PMC7545565; doi:10.1186/s12955-020-01577-9), 2020-10-08
Supplement: 12955_2020_1577_MOESM1_ESM.pdf [file 12955_2020_1577_MOESM1_ESM.pdf]

Supplementary figure 1

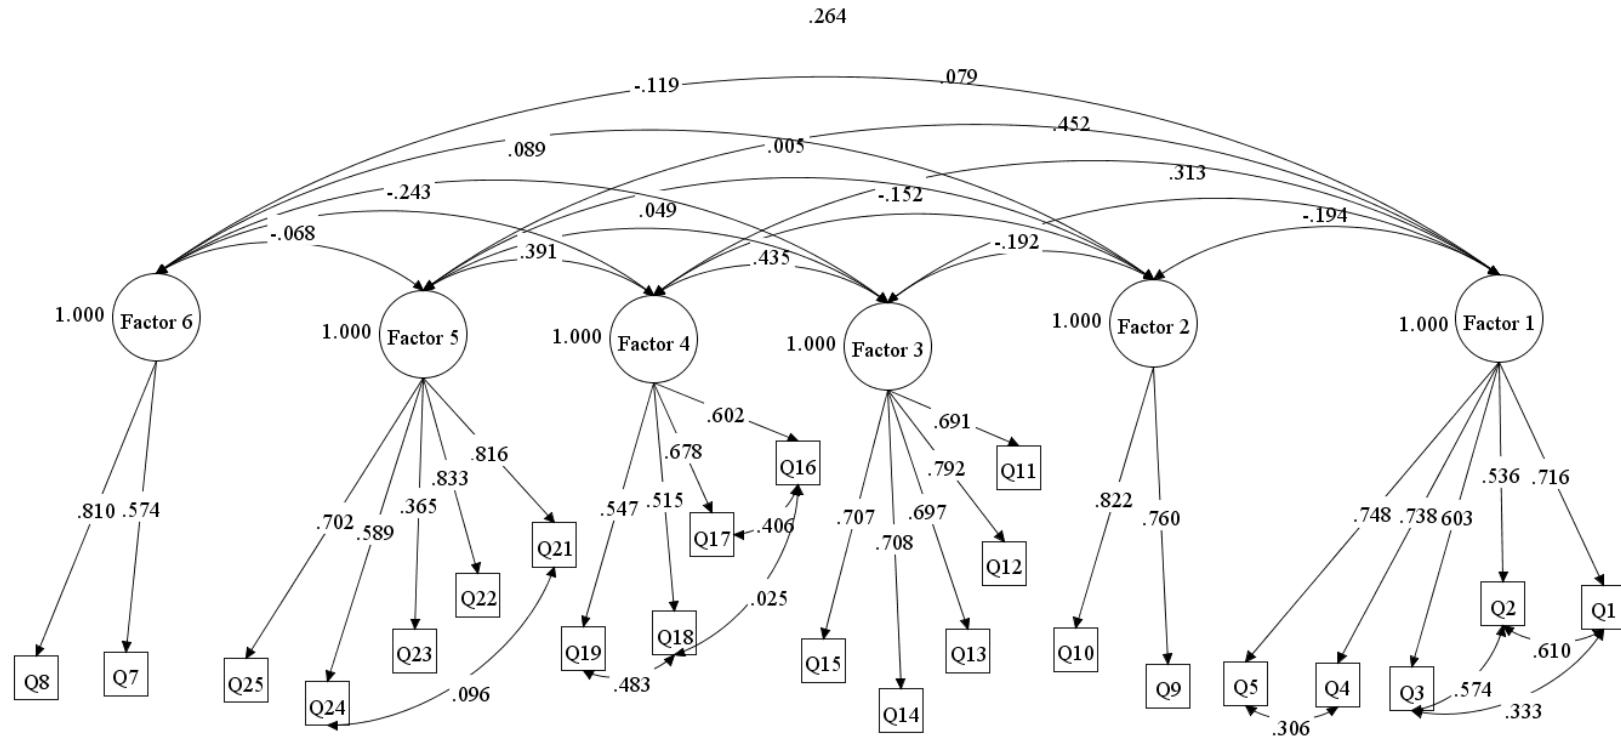

Note:

Factor 1: Reliability and Effectiveness; Factor 2: Excitement; Factor 3: Identity Stigma; Factor 4: Embarrassment about Negotiation; Factor 4: Embarrassment about Purchase; Factor 6: Displeasure
